# Supplementary material for: ARID1A alterations function as a biomarker for longer progression-free survival after anti-PD-1/PD-L1 immunotherapy
Source: PubMed Central journal article supplement — J Immunother Cancer. 2020 Feb 27;8(1):e000438. doi: 10.1136/jitc-2019-000438 (PMC7057434; doi:10.1136/jitc-2019-000438), 2020-02-27
Supplement: jitc-2019-000438supp001.pdf [file jitc-2019-000438supp001.pdf]

## SUPPLEMENTARY FILES

Supplementary Figure 1. Patient flow chart.

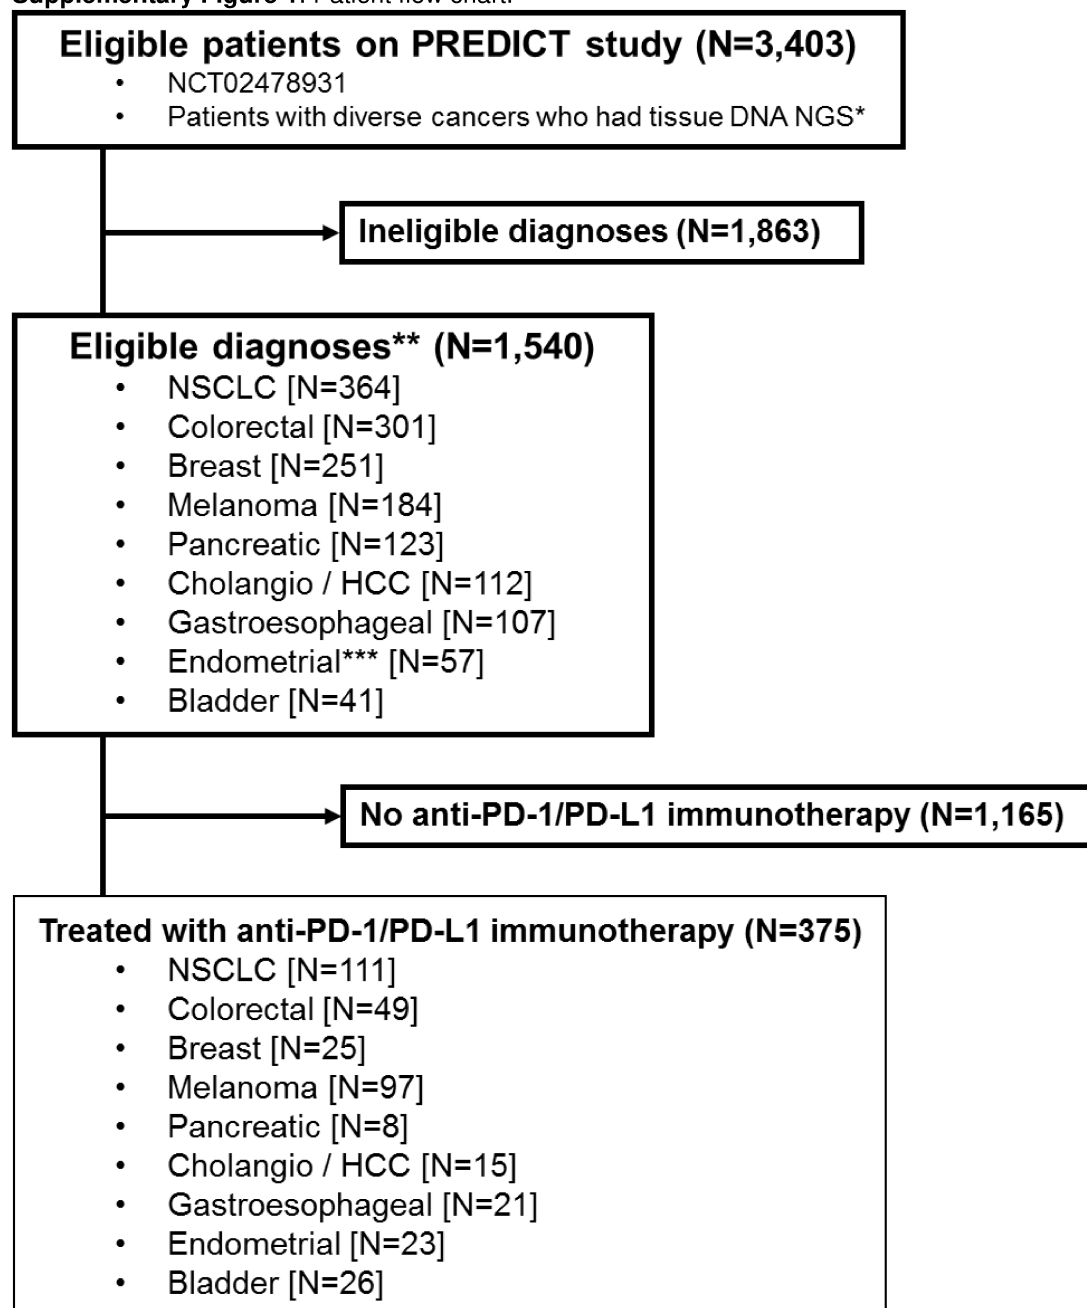

\* NGS by Foundation Medicine, Inc.

\*\* These 9 types of cancer harbor *ARID1A* alterations with frequency >5.0%.

\*\*\* Includes clear-cell carcinoma which is a rare form of endometrial cancer.

**Abbreviations:** Bladder, urothelial bladder carcinoma; Breast, breast cancer; Cholangio/HCC, cholangiocarcinoma and hepatocellular carcinoma; Colorectal, colorectal adenocarcinoma; Endometrial, uterine/ovary endometrial (endometrioid) carcinoma; Gastroesophageal, gastric/esophageal adenocarcinoma; NGS, next-generation sequencing; NSCLC, non-small cell lung cancer; Pancreatic, pancreatic ductal adenocarcinoma; PD-1/PD-L1, programmed cell death-1 and its ligand; PREDICT study, Profile-Related Evidence Determining Individualized Cancer Therapy study.

**Supplementary Figure 2.** Kaplan-Meier curve of progression-free survival among patients who received anti-PD-1/PD-L1 immunotherapy according to cancer types. Breast cancer, pancreatic ductal adenocarcinoma, cholangiocarcinoma/hepatocellular carcinoma, and urothelial bladder carcinoma were not shown because of insufficient numbers of patients with *ARID1A*-altered tumor ( $N \leq 2$ ).

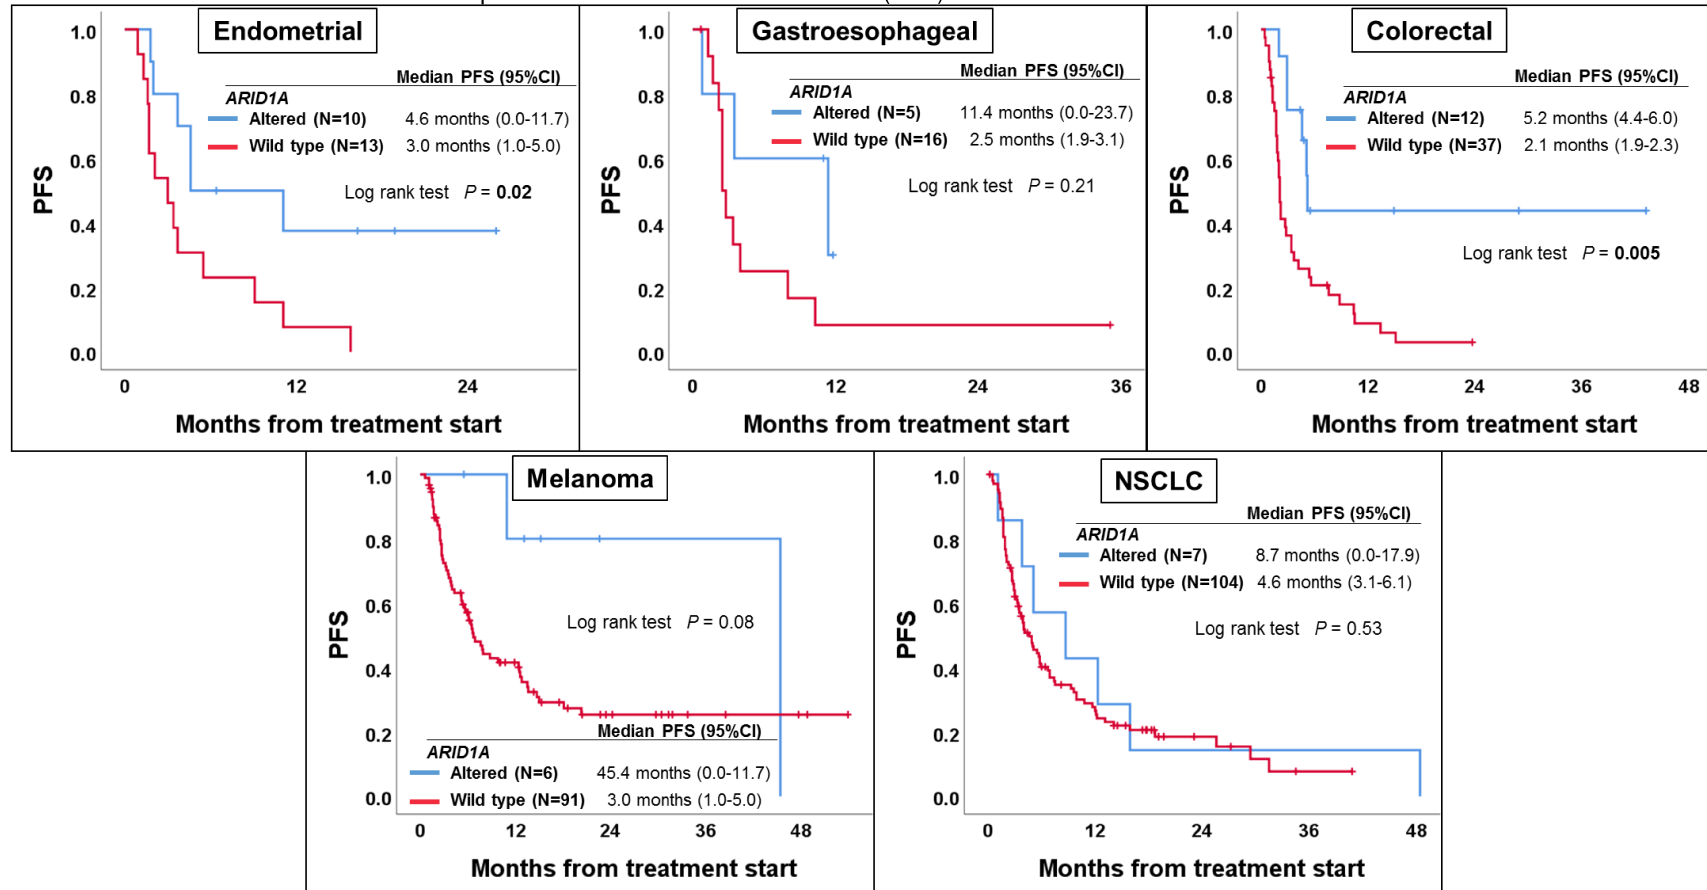

**Abbreviations:** Colorectal, colorectal adenocarcinoma; Endometrial, uterine/ovary endometrial (endometrioid) carcinoma; Gastroesophageal, gastric/esophageal adenocarcinoma; NSCLC, non-small cell lung cancer; PD-1/PD-L1, programmed cell death-1 and its ligand.

**Supplementary Figure 3.** Kaplan-Meier curve of progression-free survival among patients without TMB-High who received anti-PD-1/PD-L1 immunotherapy (N=310). Similar results were seen even if the TMB-unknown (N=24) were excluded ( $P=0.09$ ).

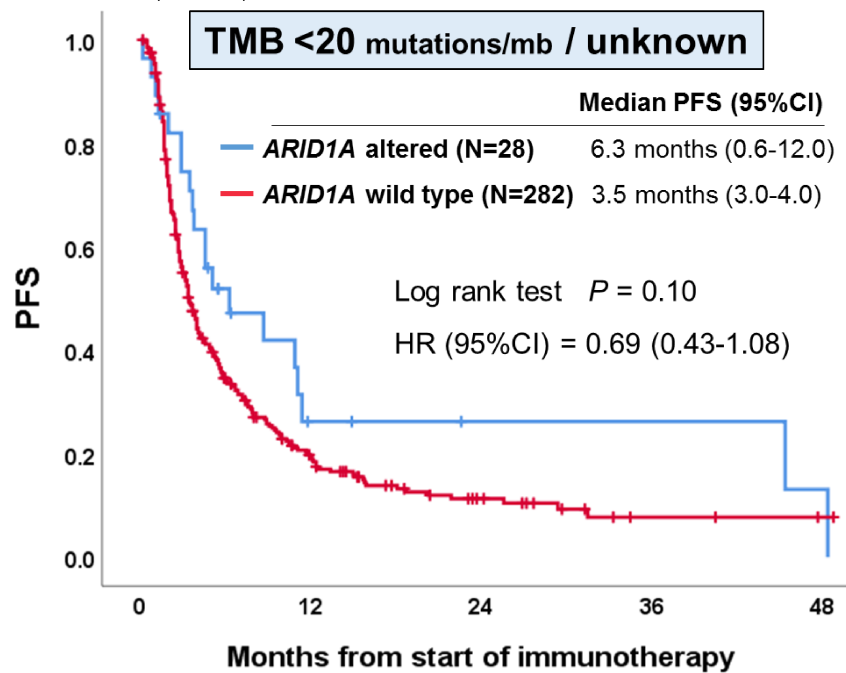

**Abbreviations:** CI, confidence interval; HR, hazard ratio; PD-1/PD-L1, programmed cell death-1 and its ligand; PFS, progression-free survival; TMB, tumor mutational burden.

**Supplementary Figure 4.** Kaplan-Meier curve of overall survival according to *ARID1A* status among patients who received anti-PD-1/PD-L1 immunotherapy (N=375).

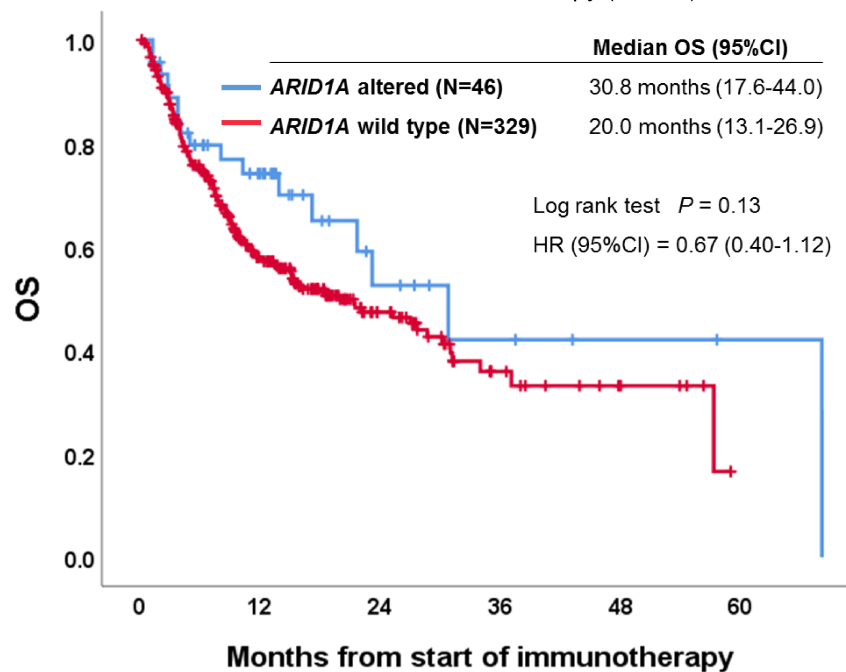

**Abbreviations:** CI, confidence interval; HR, hazard ratio; OS, overall survival; PD-1/PD-L1, programmed cell death-1 and its ligand.
